# Supplementary material for: Czechoslovakian Wolfdog Genomic Divergence from Its Ancestors Canis lupus, German Shepherd Dog, and Different Sheepdogs of European Origin
Source: MDPI journal article supplement (doi:10.3390/genes12060832), 2021-05-28
Supplement: s1 [file s1]

**Table S1:** Genes potentially associated with coat colour, performance, and behaviour traits in dogs.

| Trait            | Gene symbol     | Chr | Start position (bp) | End position (bp) | No. of SNPs in region | Literature source         |
|------------------|-----------------|-----|---------------------|-------------------|-----------------------|---------------------------|
| ATO <sup>1</sup> | <i>RSU1</i>     | 2   | 20050117            | 20299184          | 13                    | Šimonek and Židek [76]    |
|                  | <i>TTC6</i>     | 8   | 16108988            | 16282207          | 11                    | Williams et al. [77]      |
|                  | <i>TSHR</i>     | 8   | 53326655            | 53482898          | 9                     | Ahmetov et al. [78]       |
|                  | <i>ACSL1</i>    | 16  | 45735703            | 45804970          | 6                     | Bouchard et al. [54]      |
| BM <sup>2</sup>  | <i>CLINT1</i>   | 4   | 52447382            | 52505253          | 3                     | Ilska et al. [79]         |
|                  | <i>GTF2I</i>    | 6   | 5727665             | 5811965           | 8                     | vonHoldt et al. [25]      |
|                  | <i>GTF2IRD1</i> | 6   | 5886931             | 5963873           | 7                     | vonHoldt et al. [25]      |
|                  | <i>AMPD1</i>    | 17  | 52377402            | 52399520          | 2                     | Tsianos et al. [73]       |
|                  | <i>TH</i>       | 18  | 46327137            | 46335602          | 2                     | Ilska et al. [79]         |
|                  | <i>SEZ6L</i>    | 26  | 19888319            | 20076021          | 17                    | Persson et al. [24]       |
|                  | <i>TANGO2</i>   | 26  | 29266256            | 29304164          | 3                     | Persson et al. [27]       |
|                  | <i>ARVCF</i>    | 26  | 29307351            | 29359245          | 3                     | Persson et al. [24]       |
|                  | <i>COMT</i>     | 26  | 29360356            | 29366008          | 2                     | Luo et al. [80]           |
|                  | <i>TXNRD2</i>   | 26  | 29381975            | 29430206          | 2                     | Persson et al. [27]       |
|                  | <i>PAPSS2</i>   | 26  | 37725616            | 37743928          | 1                     | Bouchard et al. [81]      |
| CC <sup>3</sup>  | <i>AP3B1</i>    | 3   | 28481038            | 28751258          | 17                    | Jung et al. [82]          |
|                  | <i>SLC45A2</i>  | 4   | 73815291            | 73867437          | 3                     | Wijesena and Schmutz [66] |
|                  | <i>MC1R</i>     | 5   | 63694296            | 63695249          | 1                     | Schmutz and Berryere [83] |
|                  | <i>PSMB7</i>    | 9   | 58529723            | 58593016          | 4                     | Clark et al. [84]         |
|                  | <i>PMEL</i>     | 10  | 292597              | 300098            | 2                     | Clark et al. [84]         |
|                  | <i>TYRP1</i>    | 11  | 33317121            | 33335498          | 1                     | Schmutz et al. [63]       |
|                  | <i>KIT</i>      | 13  | 47108504            | 47190029          | 8                     | Wong et al. [67]          |
|                  | <i>CBD103</i>   | 16  | 58965216            | 58967712          | 2                     | Kerns et al. [85]         |
|                  | <i>MITF</i>     | 20  | 21612927            | 21870578          | 15                    | Rothschild et al. [58]    |
|                  | <i>TYR</i>      | 21  | 10799940            | 10894191          | 10                    | Schmutz and Berryere [83] |
|                  | <i>ASIP</i>     | 24  | 23354888            | 23393896          | 4                     | Kerns et al. [17]         |
|                  | <i>MLPH</i>     | 25  | 48121499            | 48170710          | 3                     | Schmutz and Berryere [83] |
| SE <sup>4</sup>  | <i>AGT</i>      | 4   | 8683798             | 8693880           | 1                     | Zarębska et al. [86]      |
|                  | <i>ADRB2</i>    | 4   | 59941517            | 60050298          | 10                    | Wolfarth et al. [69]      |
|                  | <i>HIF1A</i>    | 8   | 36614045            | 36656692          | 3                     | Eynon et al. [72]         |
|                  | <i>BDKRB2</i>   | 8   | 64974997            | 65003407          | 1                     | Tsianos et al. [73]       |
|                  | <i>ACE</i>      | 9   | 11497182            | 11516358          | 2                     | Huson et al. [74]         |
|                  | <i>IL6</i>      | 14  | 36473394            | 36478519          | 2                     | Wallberg et al. [87]      |
|                  | <i>ADRB3</i>    | 16  | 27445601            | 27447521          | 2                     | Santiago et al. [71]      |
|                  | <i>AMPD1</i>    | 17  | 52377402            | 52399520          | 2                     | Tsianos et al. [73]       |
|                  | <i>ACTN3</i>    | 18  | 50787353            | 50801197          | 2                     | Pimenta et al. [88]       |
|                  | <i>HFE</i>      | 35  | 24031387            | 24042413          | 1                     | Semenova et al. [89]      |
|                  | <i>MSTN</i>     | 37  | 729172              | 734362            | 2                     | Huson et al. [74]         |

<sup>1</sup>aerobic trainability of the organism, <sup>2</sup>behaviour and motivation, <sup>3</sup>coat colour, <sup>4</sup>strength and endurance

**Table S2:** The most important biological pathways associated with organism aerobic trainability based on enrichment analysis.

| GO term    | Description                                    | Enrichment Ratio | P-value  | Gene              |
|------------|------------------------------------------------|------------------|----------|-------------------|
| GO:0007190 | activation of adenylate cyclase activity       | 534.2143         | 0.001871 | <i>TSHR</i>       |
| GO:0045761 | regulation of adenylate cyclase activity       | 415.5            | 0.002405 | <i>TSHR</i>       |
| GO:0031281 | positive regulation of cyclase activity        | 373.95           | 0.002673 | <i>TSHR</i>       |
| GO:0051349 | positive regulation of lyase activity          | 287.6538         | 0.003474 | <i>TSHR</i>       |
| GO:0031279 | regulation of cyclase activity                 | 249.3            | 0.004007 | <i>TSHR</i>       |
| GO:0043085 | positive regulation of catalytic activity      | 14.2729          | 0.0049   | <i>RSU1, TSHR</i> |
| GO:0051339 | regulation of lyase activity                   | 196.8158         | 0.005075 | <i>TSHR</i>       |
| GO:0044093 | positive regulation of molecular function      | 11.08            | 0.008135 | <i>RSU1, TSHR</i> |
| GO:0010811 | positive regulation of cell-substrate adhesion | 76.31633         | 0.013061 | <i>RSU1</i>       |
| GO:0050790 | regulation of catalytic activity               | 8.328508         | 0.014403 | <i>RSU1, TSHR</i> |

**Table S3:** The most important biological pathways associated with behaviour and motivation based on enrichment analysis.

| GO term    | Description                                    | Enrichment Ratio | P-value  | Gene            |
|------------|------------------------------------------------|------------------|----------|-----------------|
| GO:0042417 | dopamine metabolic process                     | 175.9765         | 4.84E-05 | <i>TH, COMT</i> |
| GO:0006584 | catecholamine metabolic process                | 142.4571         | 7.47E-05 | <i>TH, COMT</i> |
| GO:0009712 | catechol-containing compound metabolic process | 142.4571         | 7.47E-05 | <i>TH, COMT</i> |
| GO:0018958 | phenol-containing compound metabolic process   | 67.99091         | 3.35E-04 | <i>TH, COMT</i> |
| GO:0042133 | neurotransmitter metabolic process             | 61.05306         | 4.15E-04 | <i>TH, COMT</i> |
| GO:0097164 | ammonium ion metabolic process                 | 43.35652         | 8.24E-04 | <i>TH, COMT</i> |
| GO:0001505 | regulation of neurotransmitter levels          | 26.95135         | 0.00212  | <i>TH, COMT</i> |
| GO:1901615 | organic hydroxy compound metabolic process     | 15.26327         | 0.006486 | <i>TH, COMT</i> |
| GO:0045471 | response to ethanol                            | 106.8429         | 0.009327 | <i>TH</i>       |
| GO:0070528 | protein kinase C signalling                    | 106.8429         | 0.009327 | <i>SEZ6L</i>    |

**Table S4:** The most important biological pathways associated with coat colour based on enrichment analysis.

| GO term    | Description                                     | Enrichment Ratio | P-value  | Gene                                |
|------------|-------------------------------------------------|------------------|----------|-------------------------------------|
| GO:0043473 | pigmentation                                    | 1.77E-11         | 6.61E-08 | <i>AP3B1, TYRP1, KIT, TYR, ASIP</i> |
| GO:0044550 | secondary metabolite biosynthetic process       | 6.30E-08         | 1.18E-04 | <i>TYRP1, TYR, ASIP</i>             |
| GO:0033059 | cellular pigmentation                           | 2.33E-07         | 2.44E-04 | <i>AP3B1, TYRP1, ASIP</i>           |
| GO:0046189 | phenol-containing compound biosynthetic process | 2.77E-07         | 2.44E-04 | <i>TYRP1, TYR, ASIP</i>             |
| GO:0019748 | secondary metabolic process                     | 3.25E-07         | 2.44E-04 | <i>TYRP1, TYR, ASIP</i>             |
| GO:0046148 | pigment biosynthetic process                    | 5.05E-07         | 3.15E-04 | <i>TYRP1, TYR, ASIP</i>             |
| GO:0042440 | pigment metabolic process                       | 9.33E-07         | 4.99E-04 | <i>TYRP1, TYR, ASIP</i>             |
| GO:0018958 | phenol-containing compound metabolic process    | 3.75E-06         | 0.001756 | <i>TYRP1, TYR, ASIP</i>             |
| GO:1901617 | organic hydroxy compound biosynthetic process   | 3.62E-05         | 0.015071 | <i>TYRP1, TYR, ASIP</i>             |
| GO:0030318 | melanocyte differentiation                      | 4.17E-05         | 0.015599 | <i>TYRP1, KIT</i>                   |

**Table S5:** The most important biological pathways associated with strength and endurance based on enrichment analysis.

| GO term    | Description                                                                  | Enrichment Ratio | P-value  | Gene                                               |
|------------|------------------------------------------------------------------------------|------------------|----------|----------------------------------------------------|
| GO:0097755 | positive regulation of blood vessel diameter                                 | 175.2891         | 4.47E-07 | <i>ADRB2, BDKRB2, ADRB3</i>                        |
| GO:0019220 | regulation of phosphate metabolic process                                    | 9.063885         | 5.58E-07 | <i>AGT, ADRB2, HIF1A, BDKRB2, ADRB3, MSTN</i>      |
| GO:0051174 | regulation of phosphorus metabolic process                                   | 9.063885         | 5.58E-07 | <i>AGT, ADRB2, HIF1A, BDKRB2, ADRB3, MSTN</i>      |
| GO:0003044 | regulation of systemic arterial blood pressure mediated by a chemical signal | 140.2313         | 9.08E-07 | <i>AGT, ADRB2, ADRB3</i>                           |
| GO:0003073 | regulation of systemic arterial blood pressure                               | 77.90625         | 5.64E-06 | <i>AGT, ADRB2, ADRB3</i>                           |
| GO:0042325 | regulation of phosphorylation                                                | 8.80573          | 9.00E-06 | <i>AGT, ADRB2, HIF1A, BDKRB2, ADRB3, MSTN</i>      |
| GO:1902531 | regulation of intracellular signal transduction                              | 8.094156         | 1.47E-05 | <i>AGT, ADRB2, HIF1A, BDKRB2, ADRB3, MSTN</i>      |
| GO:0035296 | regulation of tube diameter                                                  | 56.0925          | 1.54E-05 | <i>ADRB2, BDKRB2, ADRB3</i>                        |
| GO:0097746 | regulation of blood vessel diameter                                          | 56.0925          | 1.54E-05 | <i>ADRB2, BDKRB2, ADRB3</i>                        |
| GO:0009966 | regulation of signal transduction                                            | 5.490038         | 1.77E-05 | <i>AGT, ADRB2, HIF1A, BDKRB2, IL6, ADRB3, MSTN</i> |
